# Supplementary material for: Unravelling the pH-dependent mechanism of ferroelectric polarization on different dynamic pathways of photoelectrochemical water oxidation
Source: Royal Society of Chemistry journal article supplement (doi:10.1039/d4sc08291e), 2025-01-01
Supplement: d4sc08291e1.pdf [file d4sc08291e1.pdf]

## Supporting Information

### Unravelling the pH-depended mechanism of ferroelectric polarization on different dynamic pathways of photoelectrochemical water oxidation

Xing Ji<sup>†</sup>,<sup>[a]</sup> Zhouhao Zhu<sup>†</sup>,<sup>[b]</sup> Ming Zhou,<sup>[a]</sup> Ying Zhang,<sup>[c]</sup> Liyong Gan\*,<sup>[b]</sup> Yunhuai  
Zhang\*,<sup>[a]</sup> and Peng Xiao\*<sup>[b]</sup>

<sup>a</sup>College of Chemistry and Chemical Engineer, Chongqing University, Chongqing 401331, China.

<sup>b</sup>College of Physics, Chongqing University, Chongqing 401331, China.

<sup>c</sup>Xinjiang Key Laboratory of New Energy Materials and Green Chemical Engineering, College of  
Chemistry and Environmental Engineering, Xinjiang Institute of Engineering, Urumqi 830023,  
China

\*Corresponding author: xiaopeng@cqu.edu.cn;

zyh2031@cqu.edu.cn;

ganly@cqu.edu.cn.

<sup>†</sup>Xing Ji and Zhouhao Zhu contributed equally to this work.

## EXPERIMENTAL SECTION

**Preparation of BTO@TiO<sub>2</sub> Heterojunctions.** A two-step hydrothermal method was employed to successfully construct BTO@TiO<sub>2</sub> core-shell nanowire arrays (BTO@TiO<sub>2</sub> NWs), in accordance with the previously reported procedure.<sup>1</sup> For one thing, the TiO<sub>2</sub> seed layer was prepared by spin-coating on a clean FTO conductive glass using a solution containing 0.7 mL of titanium (IV) tetraisopropoxide (TTIP) and 20  $\mu$ L of 37% hydrochloric acid (HCl) in 10 mL ethanol and annealed at 500 °C for one hour in air. And then, the FTO, containing TiO<sub>2</sub> seed layer, was placed inside a glass bottle filled with 2.5 mL 37% HCl, 2.5 mL deionized water and 45  $\mu$ L TTIP. The first hydrothermal process was initiated to synthesis TiO<sub>2</sub> NWs at 170 °C for 4 h. After annealing at 500 °C for 1 h, TiO<sub>2</sub> NWs was subjected to a second hydrothermal process to construct the BTO@TiO<sub>2</sub> heterojunction. By reacting in a solution comprising 0.5 mmol of Ba(OH)<sub>2</sub>, 0.6 g of tetrabutylammonium hydroxide, 7 mL of deionized water, 5 mL of ethanol, 5 mL of diethylene glycol and 1.5 mL of isopropanol at 150 °C for 2 h, BTO@TiO<sub>2</sub> NWs heterojunction was successfully synthesized. Subsequently, the products were washed with deionized water and ethanol, and dried at 60 °C for 12 h.

**Morphological and Structural Characterization.** X-ray diffraction (XRD, Shimadzu ZD-3AX, Cu K $\alpha$  radiation) was employed to determine whether TiO<sub>2</sub> and BTO@TiO<sub>2</sub> were effectively synthesized by characterizing the crystal structure of the samples. X-ray photoelectron spectroscopy (XPS, ESCALAB 250Xi, Al K $\alpha$  radiation) was utilized to identify the differences in the elemental composition of TiO<sub>2</sub> and BTO@TiO<sub>2</sub>. Piezoelectric force microscopy (KPFM and SS-PFM, MFP-3D-BIO) was employed to corroborate the ferroelectric characteristics of BTO@TiO<sub>2</sub>. The morphologies and crystalline of TiO<sub>2</sub> and BTO@TiO<sub>2</sub> NWs were determined by field-emission scanning electron microscope (FE-SEM, JEOL, JSM-7800F) and transmission electron microscope (TEM, JEM2010-HR, 200 kV). In addition, the atomic distribution of BTO surface layer was determined using atomic-scale high-angle annular dark-field characterization (HAADF, FEI Titan G2 60-300 ChemiSTEM, 300

kV).

**Polarization of BTO@TiO<sub>2</sub> Heterojunctions.** Polarization was achieved by the construction of a two-electrode system (FTO|BTO@TiO<sub>2</sub>|FTO) with a BTO@TiO<sub>2</sub> photoanode and a clean FTO conductive glass in air. A voltage of 10 V was applied to the two electrodes for 10 min. This polarization treatment was considered positive when the BTO@TiO<sub>2</sub> photoanode was connected to the positive pole of the power source and the FTO conductive glass was connected to the negative pole. Otherwise, it was considered negative.

**Photoelectrochemical Tests.** Photoelectrochemical tests were carried out at the electrochemical workstation (CHI660E, Shanghai Chenhua) using a three-electrode system in which the counter electrode was platinum sheet, while the reference electrode was Ag/AgCl. A series of light-dark electrochemical scans and transient photocurrent tests were carried out across a range of pH electrolytes, including 0.5 M H<sub>2</sub>SO<sub>4</sub> (pH=0), 0.5 M Na<sub>2</sub>SO<sub>4</sub> (pH=7) and 1 M NaOH (pH=14). The light-dark electrochemical scans were conducted at a scan rate of 50 mV/s. The positive scans were performed under simulated solar illumination of 100 mW/cm<sup>2</sup> in order to ascertain the water oxidation performance of the photoanodes. The negative scans were performed in a dark environment to detect the reduction of the residual surface states. The transient photocurrents were measured at different bias voltages, with alternating light-dark intervals of 5 s and a sampling interval of 0.001 s<sup>-1</sup>.

**Determination of separation and catalytic efficiency.** The separation ( $\eta_{\text{sep}}$ ) and catalytic efficiency ( $\eta_{\text{oxi}}$ ) can be expressed as follow:

$$\eta_{\text{sep}} = J_{\text{sulfite}} / J_{\text{abs}}$$

$$\eta_{\text{oxi}} = J_{\text{oxi}} / J_{\text{sulfite}}$$

where  $J_{\text{oxi}}$  is the photocurrent density for oxygen evolution under pH=2, 7 and 12.  $J_{\text{sulfite}}$  is the photocurrent density for sulfite oxidation. Sulfite oxidation measures were carried out under 0.5 M Na<sub>2</sub>SO<sub>3</sub> solution with pH=2, 7 and 12.  $J_{\text{abs}}$  is the theoretical maximum photocurrent of TiO<sub>2</sub> (1.84 mA/cm<sup>2</sup>).

**Theoretical Calculation Details.** All spin-polarized density functional theory simulation was performed based on Vienna *ab initio* simulation package<sup>2</sup>. The exchange-correlation potentials were described by Perdew–Burke–Ernzerhof functional within generalized gradient approximation<sup>3</sup>. The D3 method was used to describe the effects of nonlocal van der Waals interactions<sup>4</sup>. The cutoff energy was set as 520 eV and Monkhorst-Pack *k*-points was set as 3×3×1 and 9×9×1 for geometry optimization and electronic structure, respectively. The convergence threshold of energy and force was set as 10<sup>-5</sup> eV and 0.02 eV/Å, respectively. A z-direction vacuum layer of 20 Å was included to avoid periodic interaction.

The OER free energy change was obtained using the computational hydrogen electrode (CHE) model proposed by Nørskov *et al.*<sup>5</sup> which is expressed by the following equation:

$$\Delta G = \Delta E + \Delta E_{\text{ZPE}} - T\Delta S + \Delta G_{\text{U}} + \Delta G_{\text{pH}}$$

where  $\Delta E$  is the total energy difference of the intermediates,  $\Delta E_{\text{ZPE}}$  and  $T\Delta S$  are the zero-point vibrational energy and entropy contributions at 298.15 K, respectively.  $\Delta G_{\text{U}}$  and  $\Delta G_{\text{pH}}$  are the free energy contribution with the applied potential  $U$  and pH, which can be defined as:

$$\Delta G_{\text{U}} = -eU$$

$$\Delta G_{\text{pH}} = -k_{\text{B}}T \ln 10 \times \text{pH}$$

where  $k_{\text{B}}$  is Boltzmann constant, and the value of pH in this work is set to be 0. The charge density differences for the heterjunctions only and for \*O adsorption is defined in the following

$$\rho = \rho_{\text{TiO}_2\text{-BTO}} - \rho_{\text{TiO}_2} - \rho_{\text{BTO}}$$

$$\rho_{\text{ads}} = \rho_{\text{TiO}_2\text{-BTO@O}} - \rho_{\text{TiO}_2\text{-BTO@O}} - \rho_{\text{O}}$$

where  $\rho_{\text{TiO}_2\text{-BTO@O}}$ ,  $\rho_{\text{TiO}_2\text{-BTO}}$ ,  $\rho_{\text{TiO}_2}$ ,  $\rho_{\text{BTO}}$  and  $\rho_{\text{O}}$  are the charge density of TiO<sub>2</sub>-BTO with \*O adsorbed, TiO<sub>2</sub>-BTO, TiO<sub>2</sub>, BTO and an isolated O atom, respectively.

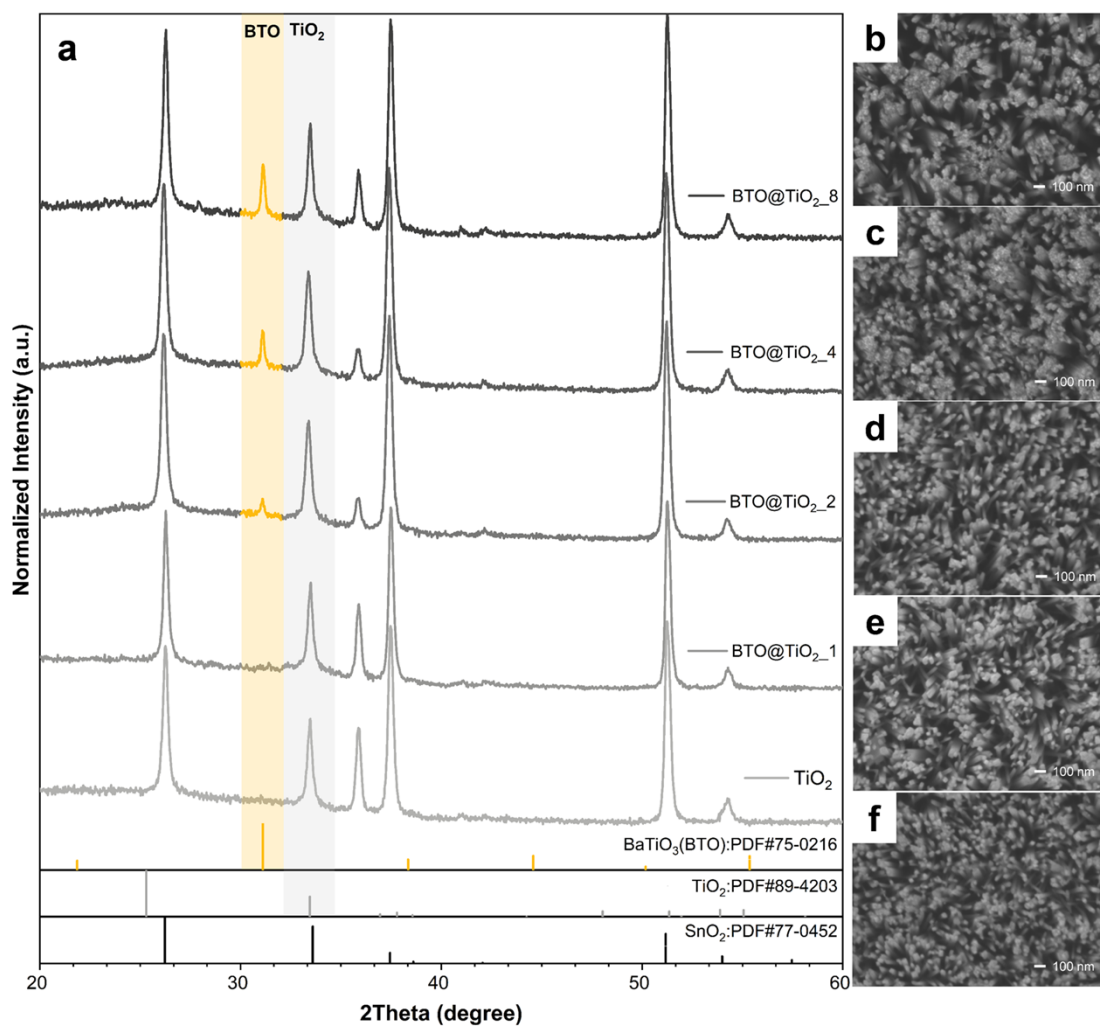

**Fig. S1** (a) X-ray diffraction patterns of hydrothermally prepared TiO<sub>2</sub> as well as BTO@TiO<sub>2</sub> with different times of hydrothermal conversion. Scanning electron microscopy images of (b) TiO<sub>2</sub>, (c) BTO@TiO<sub>2</sub>\_1 with 1 h hydrothermal reaction, (d) BTO@TiO<sub>2</sub>\_2 with 2 h hydrothermal reaction, (e) BTO@TiO<sub>2</sub>\_4 with 4 h hydrothermal reaction, and (f) BTO@TiO<sub>2</sub>\_8 with 8 h hydrothermal reaction.

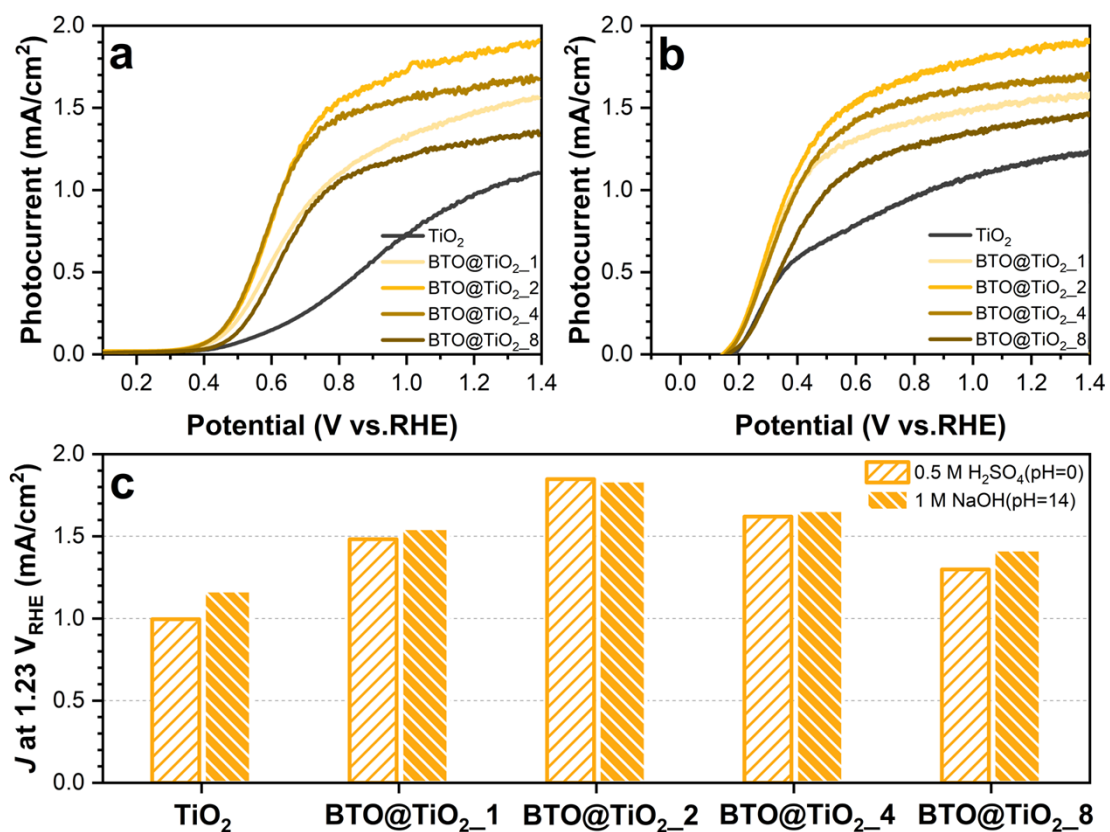

**Fig. S2** The photocurrent curves of TiO<sub>2</sub> Nws and BTO@TiO<sub>2</sub> prepared with different reaction times under (a) 0.5 M H<sub>2</sub>SO<sub>4</sub> (b) and 1 M NaOH electrolytes. (c) The photocurrent values of TiO<sub>2</sub> Nws and BTO@TiO<sub>2</sub> at 1.23 V<sub>RHE</sub>.

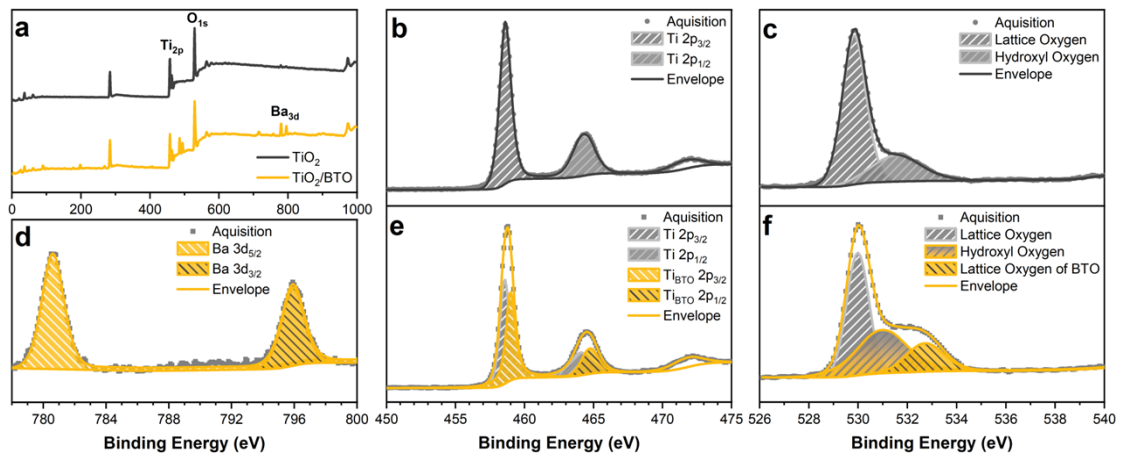

**Fig. S3** (a) The photoelectron spectra of TiO<sub>2</sub> and BTO@TiO<sub>2</sub>. The XPS spectra of (b) Ti 2p and (c) O 1s of TiO<sub>2</sub>, (d) Ba 3d, (e) Ti 2p and (f) O 1s of BTO@TiO<sub>2</sub>.

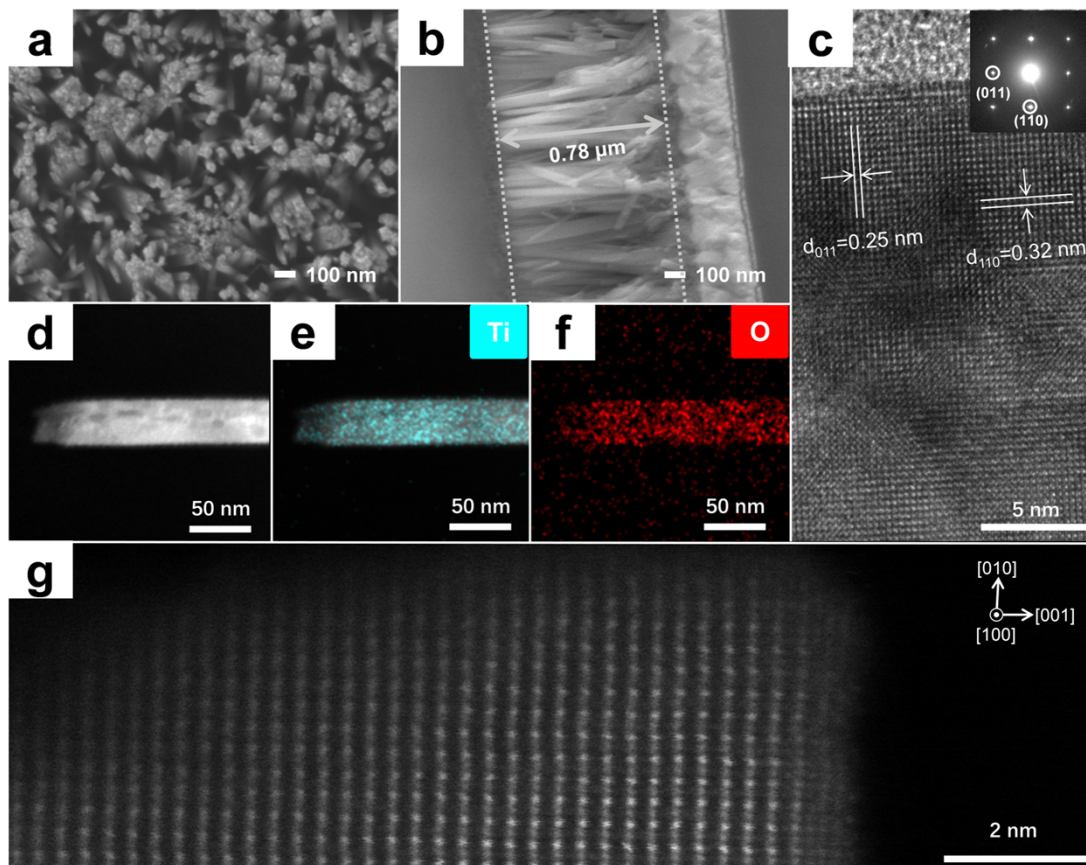

**Fig. S4** SEM images of  $\text{TiO}_2$  NWs with (a) top view and (b) side view. (c) TEM images of  $\text{TiO}_2$  NWs. (d-f) Energy-dispersive X-ray spectroscopy (EDX) elemental distribution of  $\text{TiO}_2$  NWs. (g) Atomic-resolution HAADF-STEM image of  $\text{TiO}_2$  NWs.



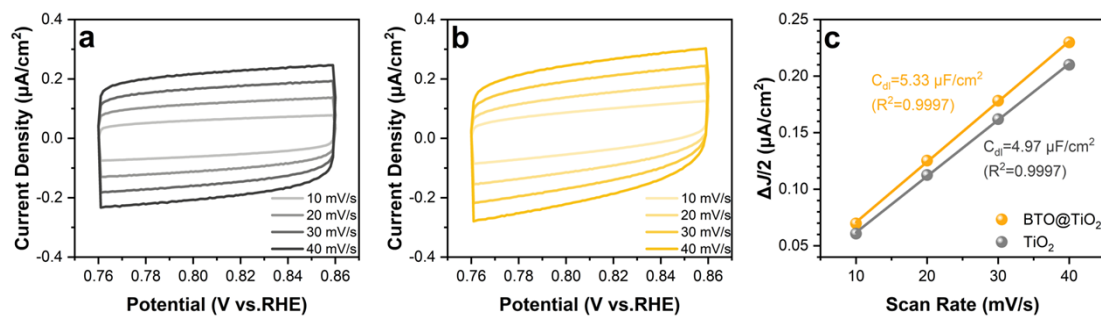

**Fig. S5** Cyclic voltammetry curves of TiO<sub>2</sub> (a) and BTO@TiO<sub>2</sub> (b) at different scan rates. (c) The relationship between scan rate and  $\Delta J/2$ .

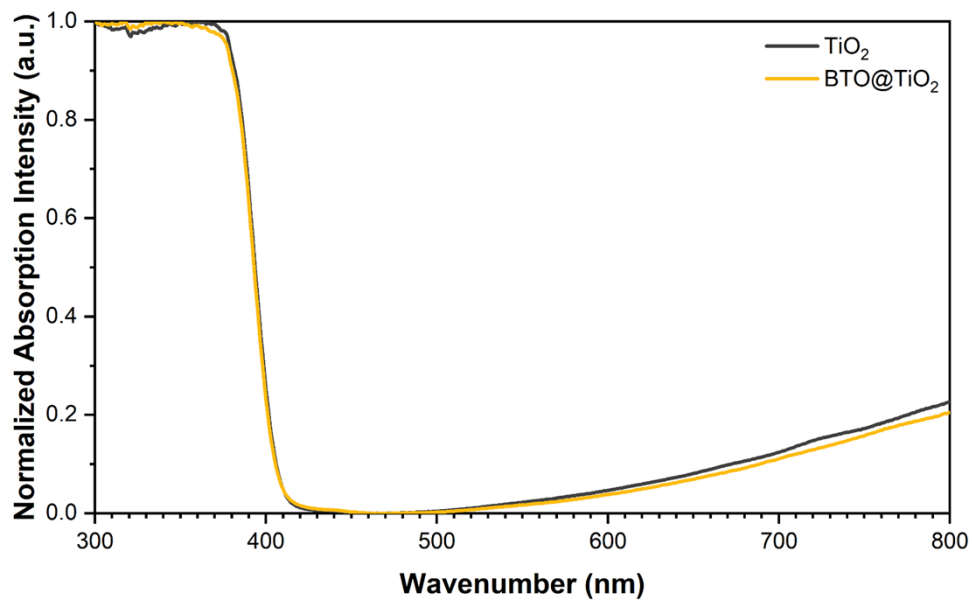

**Fig. S6** The UV-visible absorption of  $\text{TiO}_2$  and  $\text{BTO@TiO}_2$  NWs array samples.

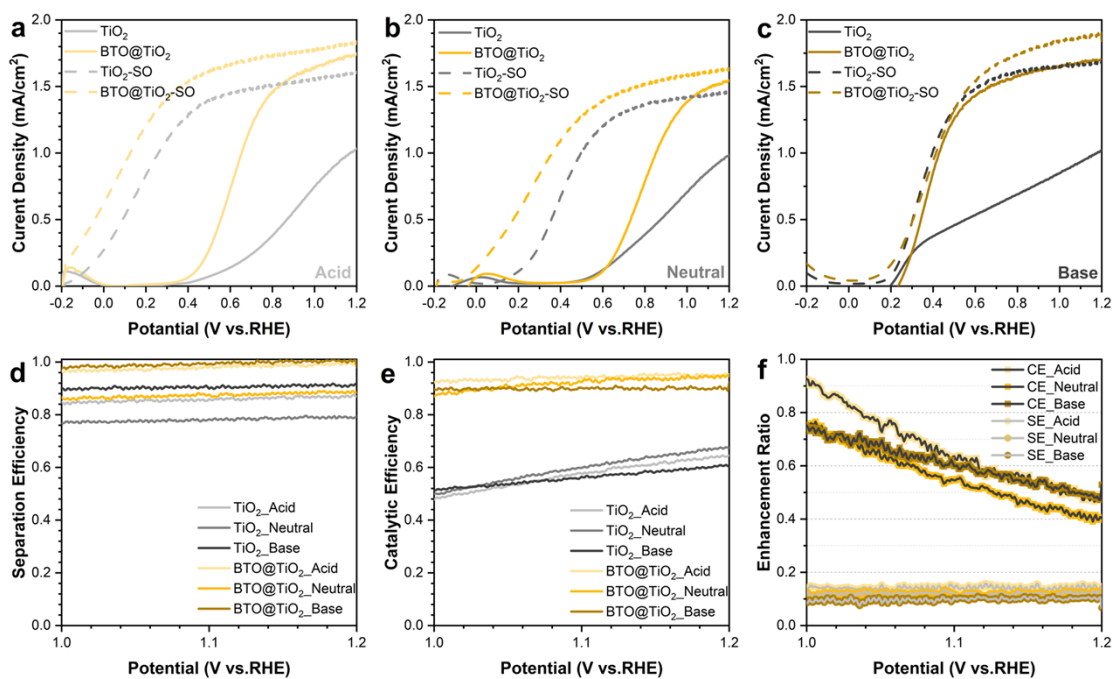

**Fig. S7** The photocurrent curves of TiO<sub>2</sub> and BTO@TiO<sub>2</sub> photoanodes for oxygen evolution and sulfite oxidation with 0.5 M Na<sub>2</sub>SO<sub>3</sub> in (a) acid, (b) neutral and (c) base. (d) The separation (e) and catalytic efficiency of TiO<sub>2</sub> and BTO@TiO<sub>2</sub> photoanodes under different pH electrolytes. (f) Enhancement ratio of separation and catalytic efficiency from TiO<sub>2</sub> to BTO@TiO<sub>2</sub> photoanodes under different pH electrolytes.

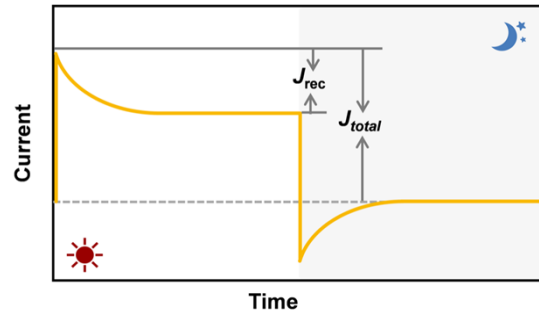

**Fig. S8** An illustration on establishing the total photocurrent ( $J_{total}$ ) as well as the surface recombination current ( $J_{rec}$ ) through transient photocurrent response.

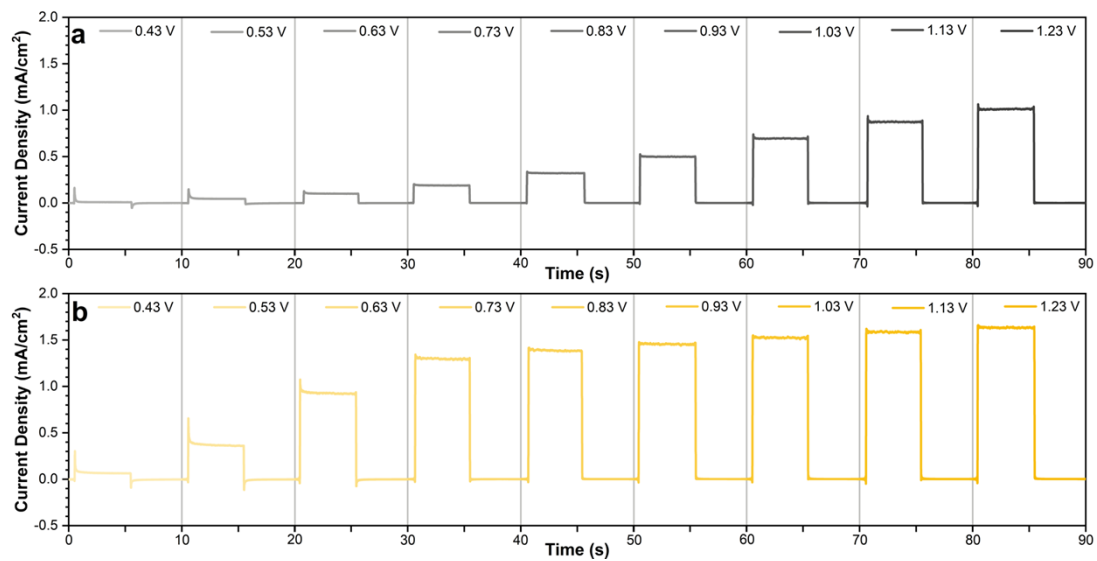

**Fig. S9** Transient photocurrent spectra of (a) TiO<sub>2</sub> and (b) BTO@TiO<sub>2</sub> at different bias in 0.5 M H<sub>2</sub>SO<sub>4</sub> (pH=0).

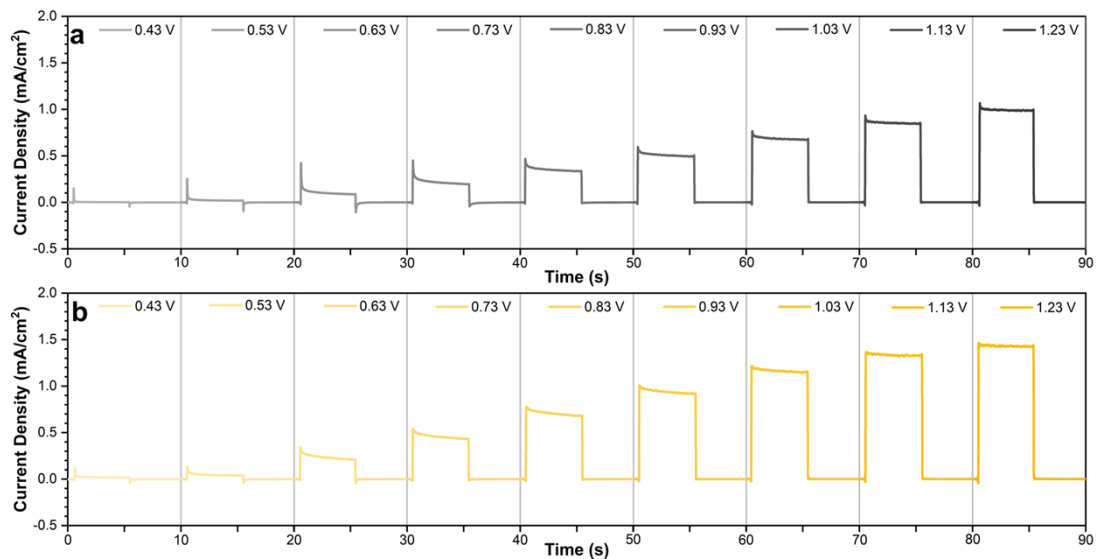

**Fig. S10** Transient photocurrent spectra of (a) TiO<sub>2</sub> and (b) BTO@TiO<sub>2</sub> at different bias in 0.5 M Na<sub>2</sub>SO<sub>4</sub> (pH=7).

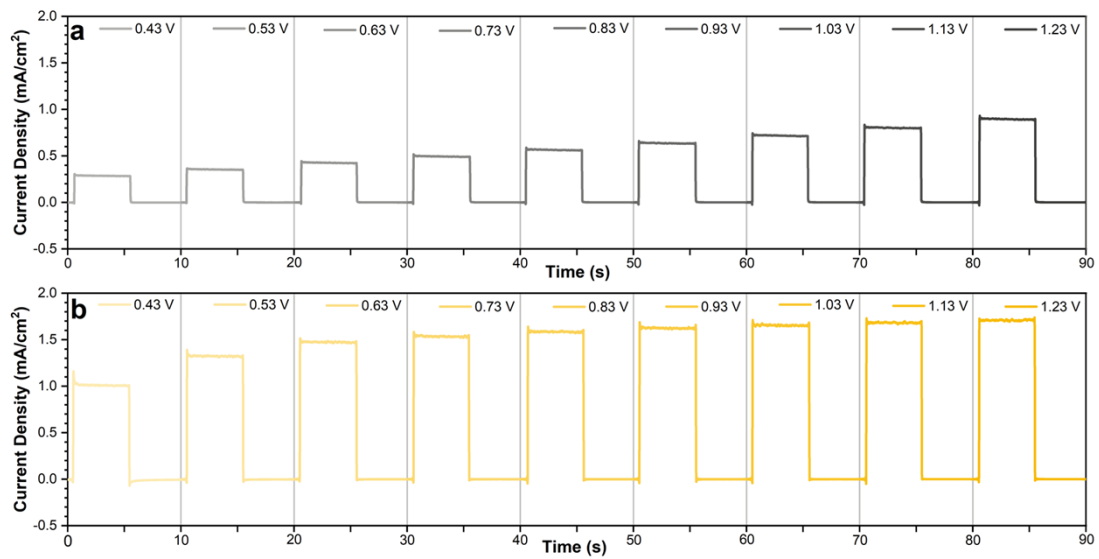

**Figure S11.** Transient photocurrent spectra of (a) TiO<sub>2</sub> and (b) BTO@TiO<sub>2</sub> at different bias in 1 M NaOH (pH=14).

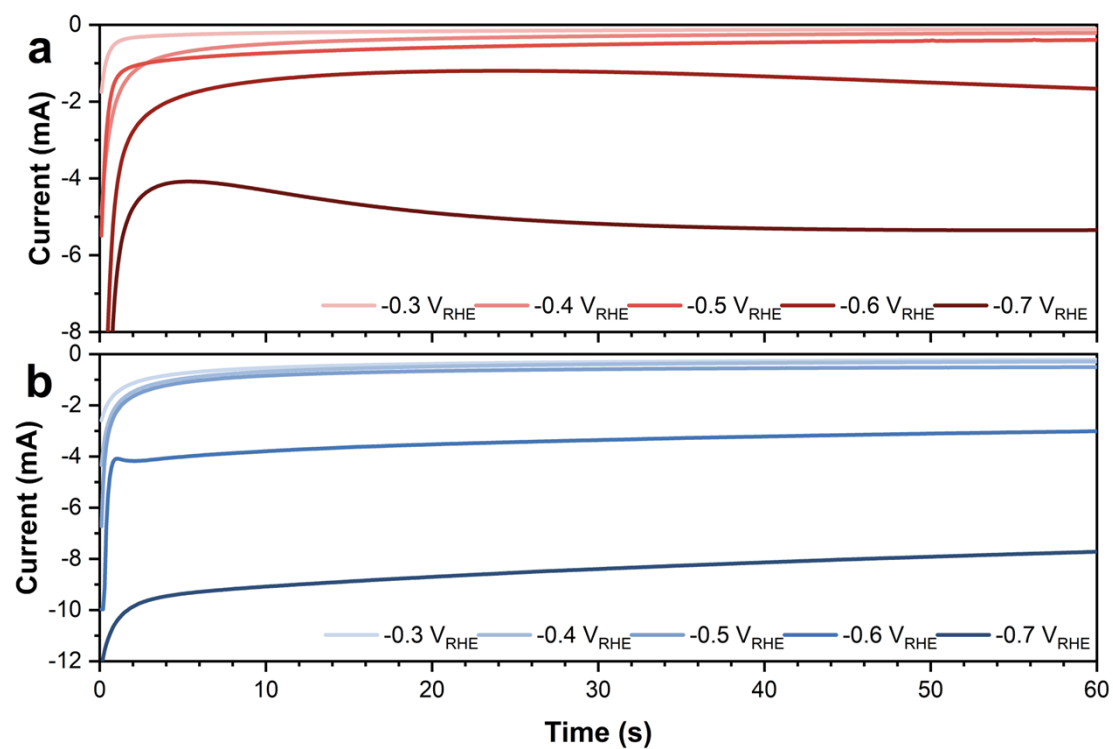

**Fig. S12** The current-time curves of TiO<sub>2</sub> with different reduction potential in (a) 0.5 M H<sub>2</sub>SO<sub>4</sub> and (b) 1 M NaOH electrolyte.



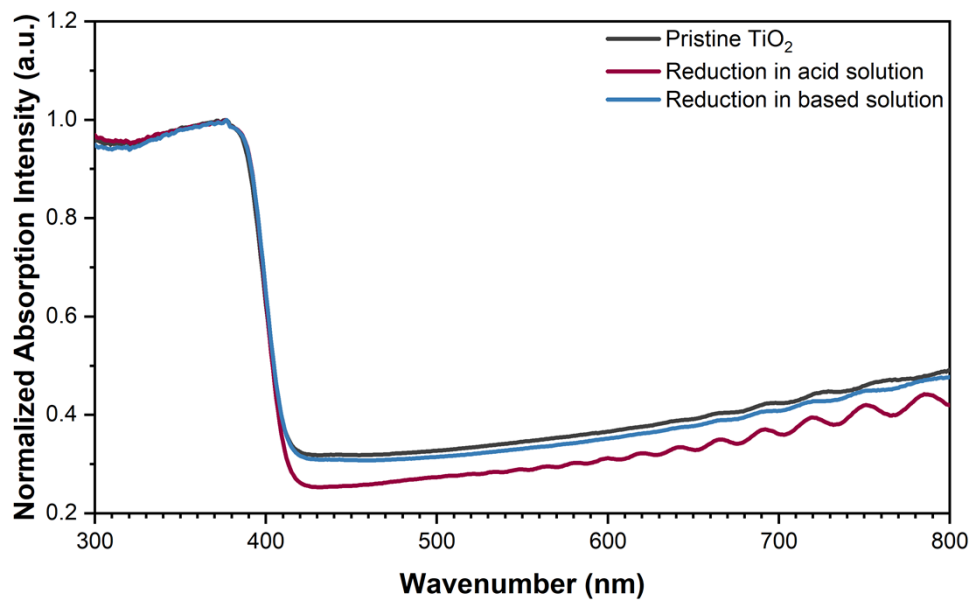

**Fig. S13** The UV-visible absorption of TiO<sub>2</sub> before and after electrochemical reduction treatment.

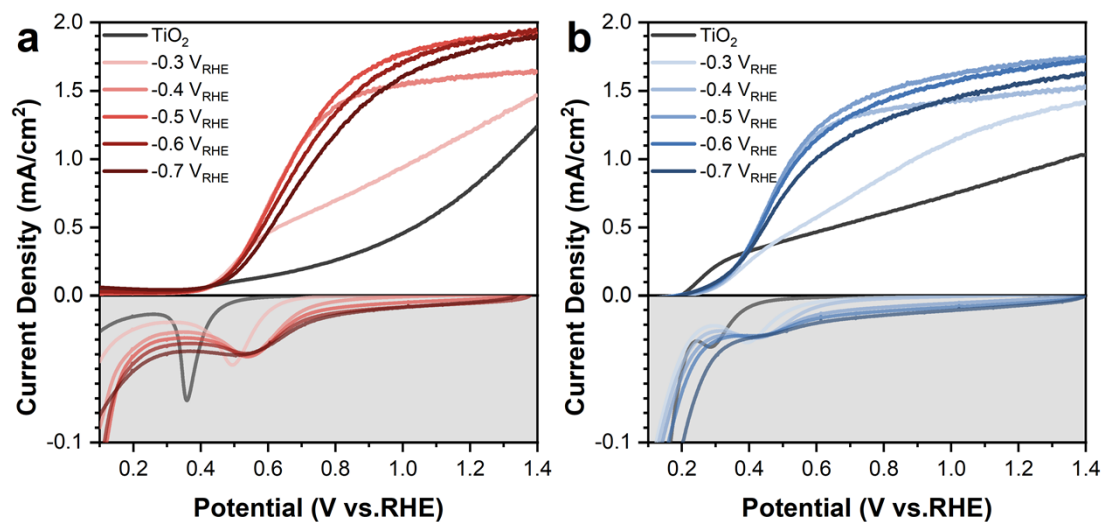

**Fig. S14** Electrochemical fingerprints scan of reduced  $\text{TiO}_2$  in (a) pH=0 and (b) pH=14.

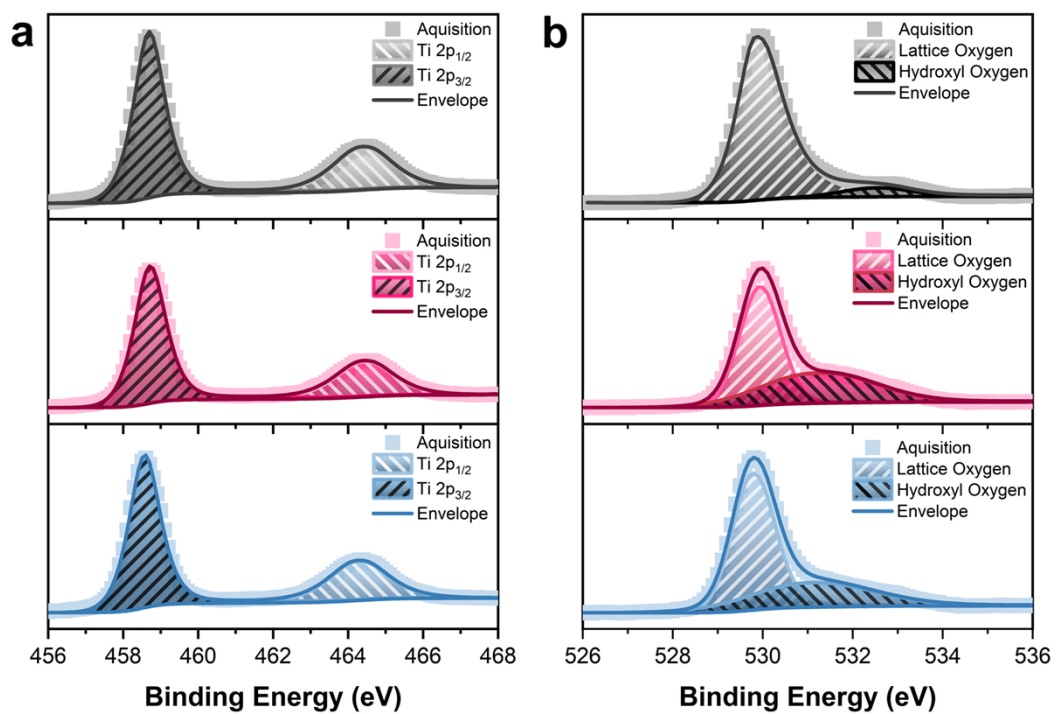

**Fig. S15.** XPS spectra of Ti (a) and O (b) in  $\text{TiO}_2$  before and after electrochemical reduction.

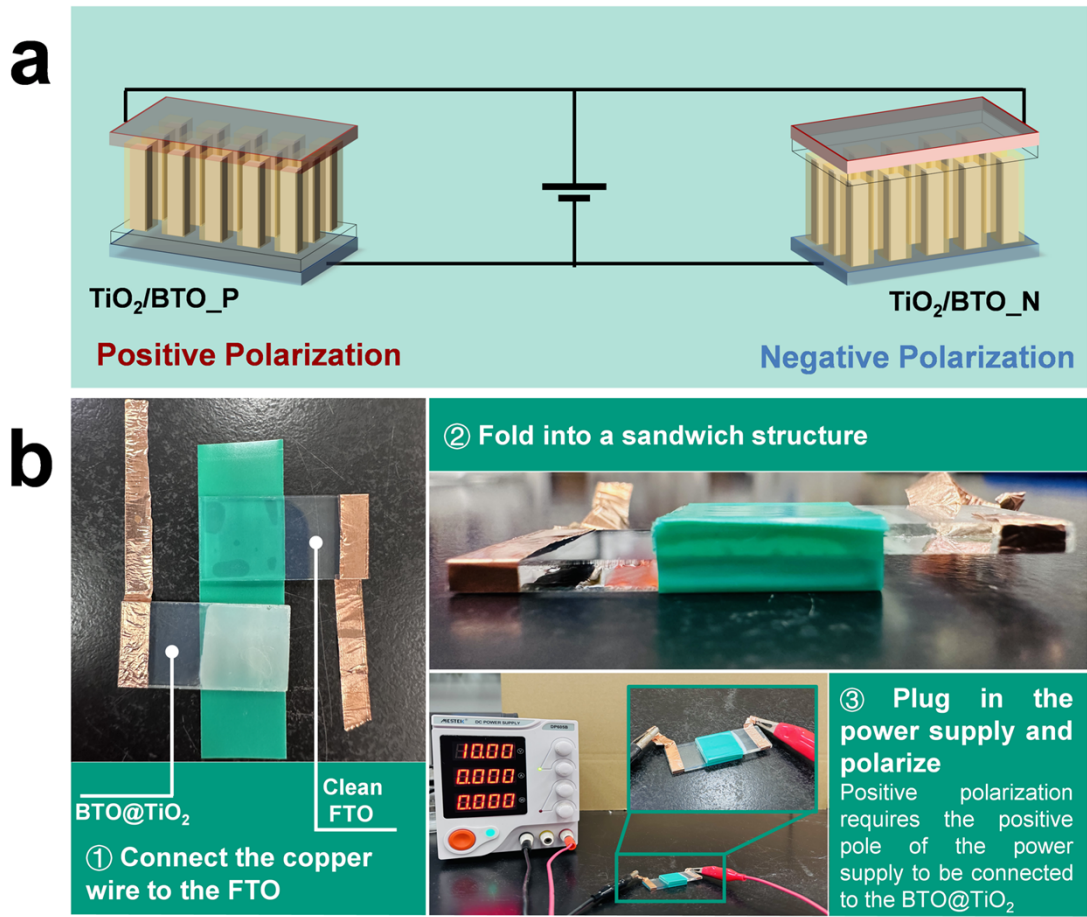

**Fig. S16** (a) Diagram of the apparatus used to achieve positive and negative polarization of  $\text{BTO@TiO}_2$ . (b) The specific device to achieve polarization.

**Table S1.** Comparison of reported ferroelectric-based photoelectrode

| Materials                                               | Electrolyte                                     | Poling Method                                 | J at 1.23 V <sub>RHE</sub><br>before poling<br>(mA/cm <sup>2</sup> ) | J at 1.23 V <sub>RHE</sub><br>after poling<br>(mA/cm <sup>2</sup> ) | Polarization induced<br>enhancement<br>(mA/cm <sup>2</sup> ) | Reference        |
|---------------------------------------------------------|-------------------------------------------------|-----------------------------------------------|----------------------------------------------------------------------|---------------------------------------------------------------------|--------------------------------------------------------------|------------------|
| BaTiO <sub>3</sub>                                      | 0.5 M Na <sub>2</sub> SO <sub>4</sub> (pH=5.95) | 52.8 kV cm <sup>-1</sup> in air               | 0.141                                                                | 0.276                                                               | 0.135                                                        | 6                |
| BiFeO <sub>3</sub>                                      | 1 M KOH (pH=13.6)                               | +40 V in Ethanol                              | 0.016                                                                | 0.088                                                               | 0.072                                                        | 7                |
| BaTiO <sub>3</sub> -TiO <sub>2</sub>                    | 1 M NaOH (pH=13.6)                              | +3 V in 2 M KCl aqueous                       | 1.30                                                                 | 1.40                                                                | 0.10                                                         | 1                |
| SrTiO <sub>3</sub> -TiO <sub>2</sub>                    | 1 M NaOH (pH=13.6)                              | +10 V in air                                  | 1.40                                                                 | 1.45                                                                | 0.05                                                         | 8                |
| BiFeO <sub>3</sub> /Sn: TiO <sub>2</sub>                | 1 M NaOH (pH=13.6)                              | +2 V in 1 M KOH                               | 1.47                                                                 | 1.76                                                                | 0.29                                                         | 9                |
| BaTiO <sub>3</sub> /WO <sub>3</sub>                     | 0.5 M PBS (pH=7)                                | +20 V in air                                  | 0.05                                                                 | 0.09                                                                | 0.04                                                         | 10               |
| Fe <sub>2</sub> O <sub>3</sub> -BaTiO <sub>3</sub>      | 1 M NaOH (pH=13.6)                              | +8 V in propylene carbonate                   | 0.23                                                                 | 0.33                                                                | 0.10                                                         | 11               |
| TiO <sub>2</sub> /BaTiO <sub>3</sub> /Ag <sub>2</sub> O | 1 M NaOH (pH=13.6)                              | +2 V in 1 M NaOH                              | 1.30                                                                 | 1.55                                                                | 0.25                                                         | 12               |
| Li-doped ZnO                                            | 0.5 M Na <sub>2</sub> SO <sub>4</sub> (pH=7)    | +2 V in 0.5 M Na <sub>2</sub> SO <sub>4</sub> | 1.75                                                                 | 1.90                                                                | 0.15                                                         | 13               |
| Bi <sub>2</sub> FeCrO <sub>6</sub>                      | 0.5 M Na <sub>2</sub> SO <sub>4</sub> (pH=7)    | +15 V in air                                  | 0.10                                                                 | 0.15                                                                | 0.05                                                         | 14               |
| NaNbO <sub>3</sub>                                      | 0.5 M Na <sub>2</sub> SO <sub>4</sub> (pH=7)    | +5 V in air                                   | 0.31                                                                 | 0.51                                                                | 0.20                                                         | 15               |
| Fe <sub>2</sub> O <sub>3</sub> /PZT                     | 1 M NaOH (pH=13.6)                              | +5 V in 1 M KCl                               | 1.00                                                                 | 1.25                                                                | 0.25                                                         | 16               |
| BaTiO <sub>3</sub> /Nb: SrTiO <sub>3</sub>              | 0.1 M NaOH (pH=13)                              | +8 V in propylene carbonate                   | 0.09                                                                 | 0.21                                                                | 0.12                                                         | 17               |
| <b>BTO@TiO<sub>2</sub></b>                              | <b>pH=11</b>                                    | <b>+ 10 V in air</b>                          | <b>1.08</b>                                                          | <b>1.60</b>                                                         | <b>0.52</b>                                                  | <b>This work</b> |

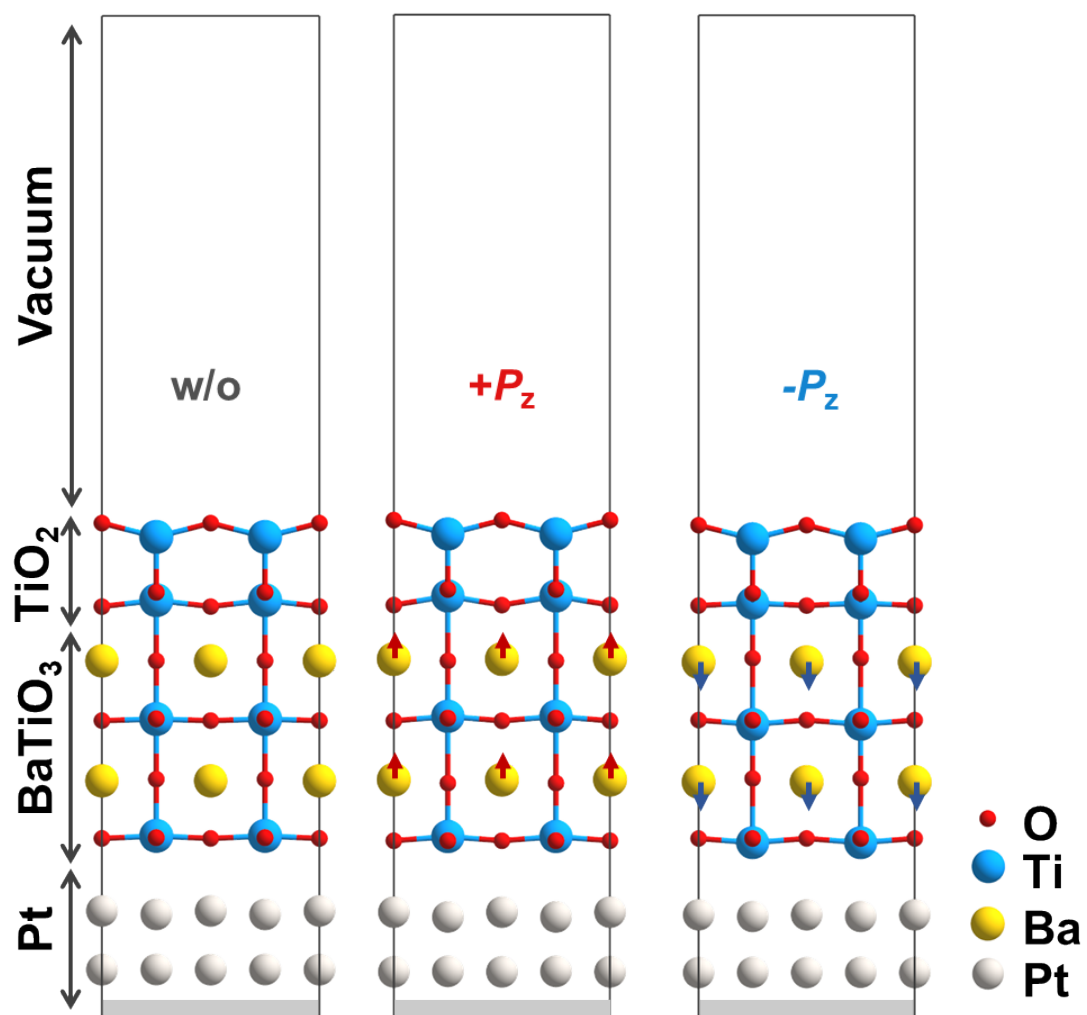

Fig. S17 The geometries of BTO@TiO<sub>2</sub> without (w/o) and with positive (+P<sub>z</sub>) and negative polarization (-P<sub>z</sub>).

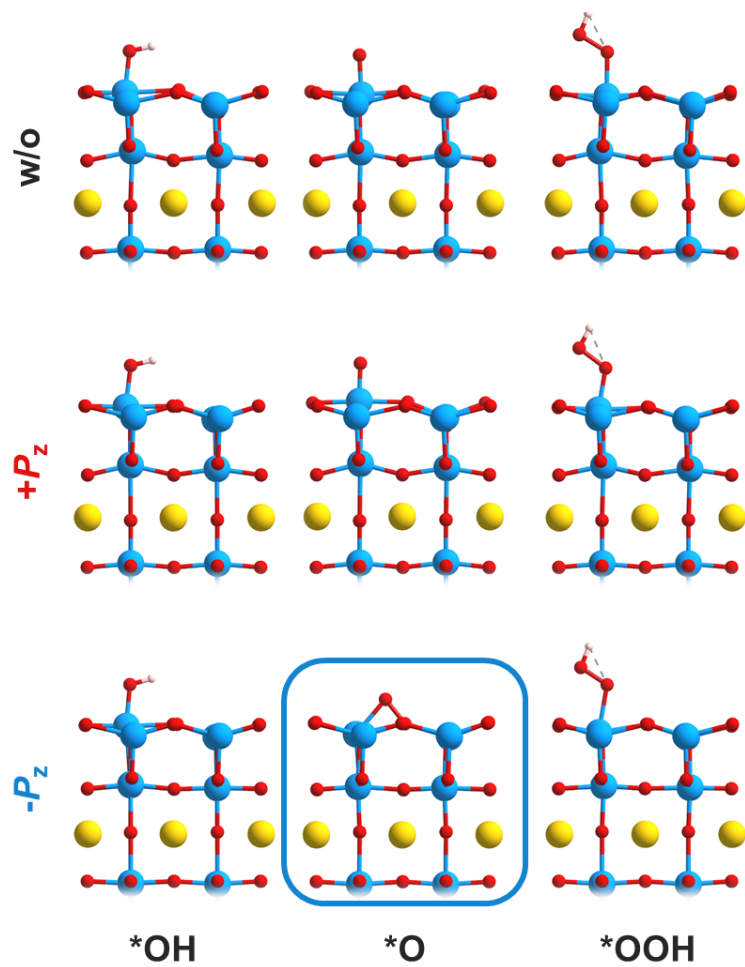

**Fig. S18** Adsorption geometries of different intermediates on the w/o, +P<sub>z</sub>, -P<sub>z</sub> of BTO@TiO<sub>2</sub>

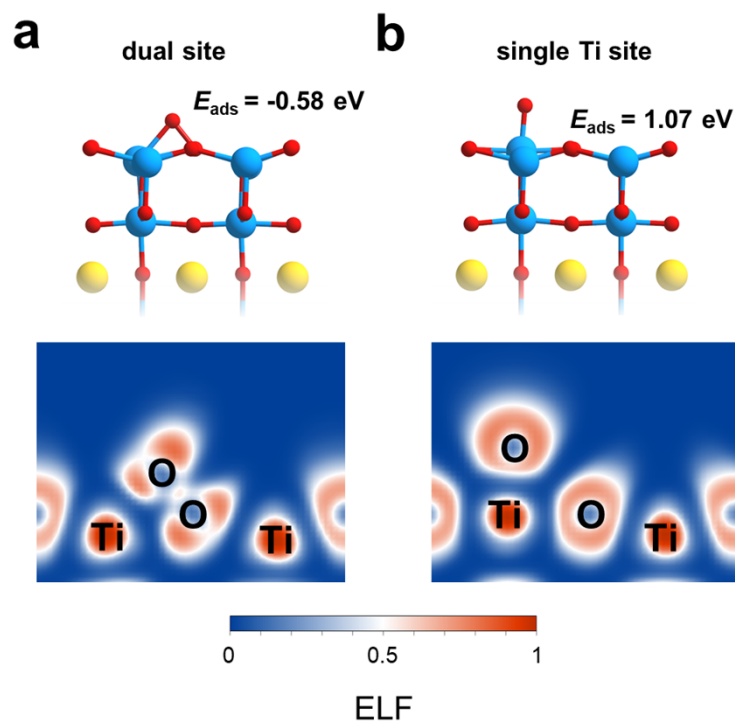

**Fig. S19** Side view (upper panel) of configuration with  $O^*$  adsorbed at (a) a dual site (one surface Ti and one surface O) and (b) only one surface Ti site on  $-P_z$  BTO@TiO<sub>2</sub>. Corresponding electronic localization function (ELF) plot is presented in the lower panel.



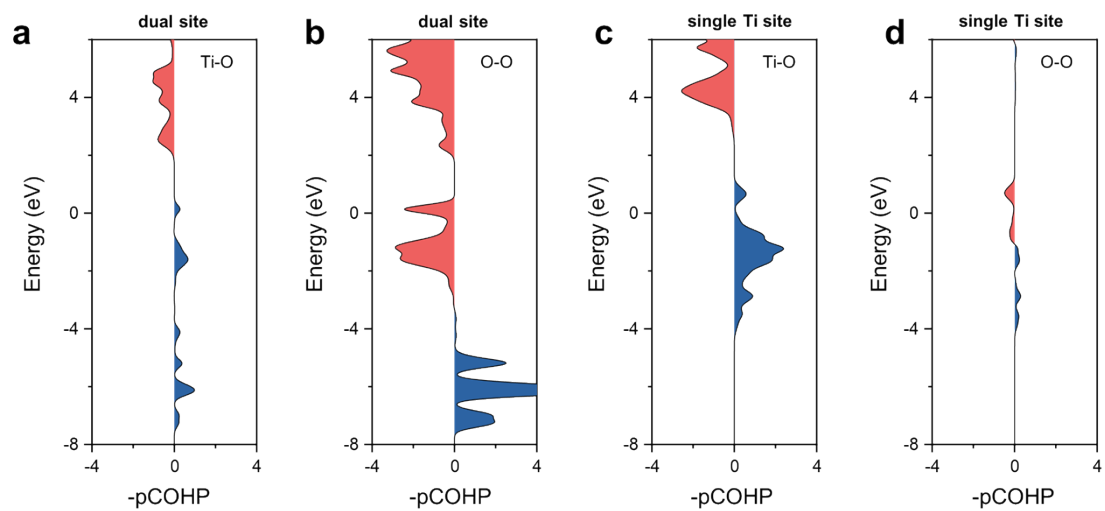

**Fig. S20** Crystal Orbital Hamilton Populations (COHP) of Ti-O and O-O bond in the configuration with O\* adsorbed at (a-b) a dual site and (c-d) a single Ti site on the  $-P_z$  BTO@TiO<sub>2</sub>.

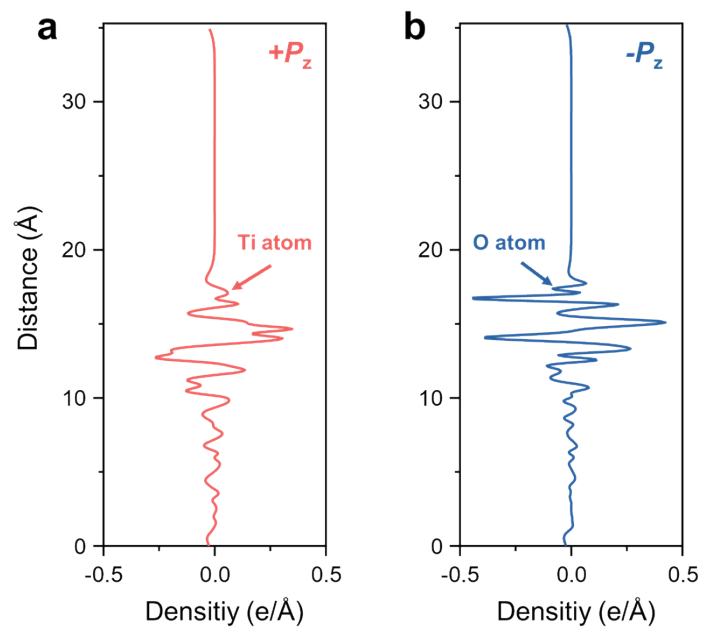

**Fig. S21** Planar average charge density difference between TiO<sub>2</sub> and BTO in the (a) +P<sub>z</sub> and (b) -P<sub>z</sub>, respectively.

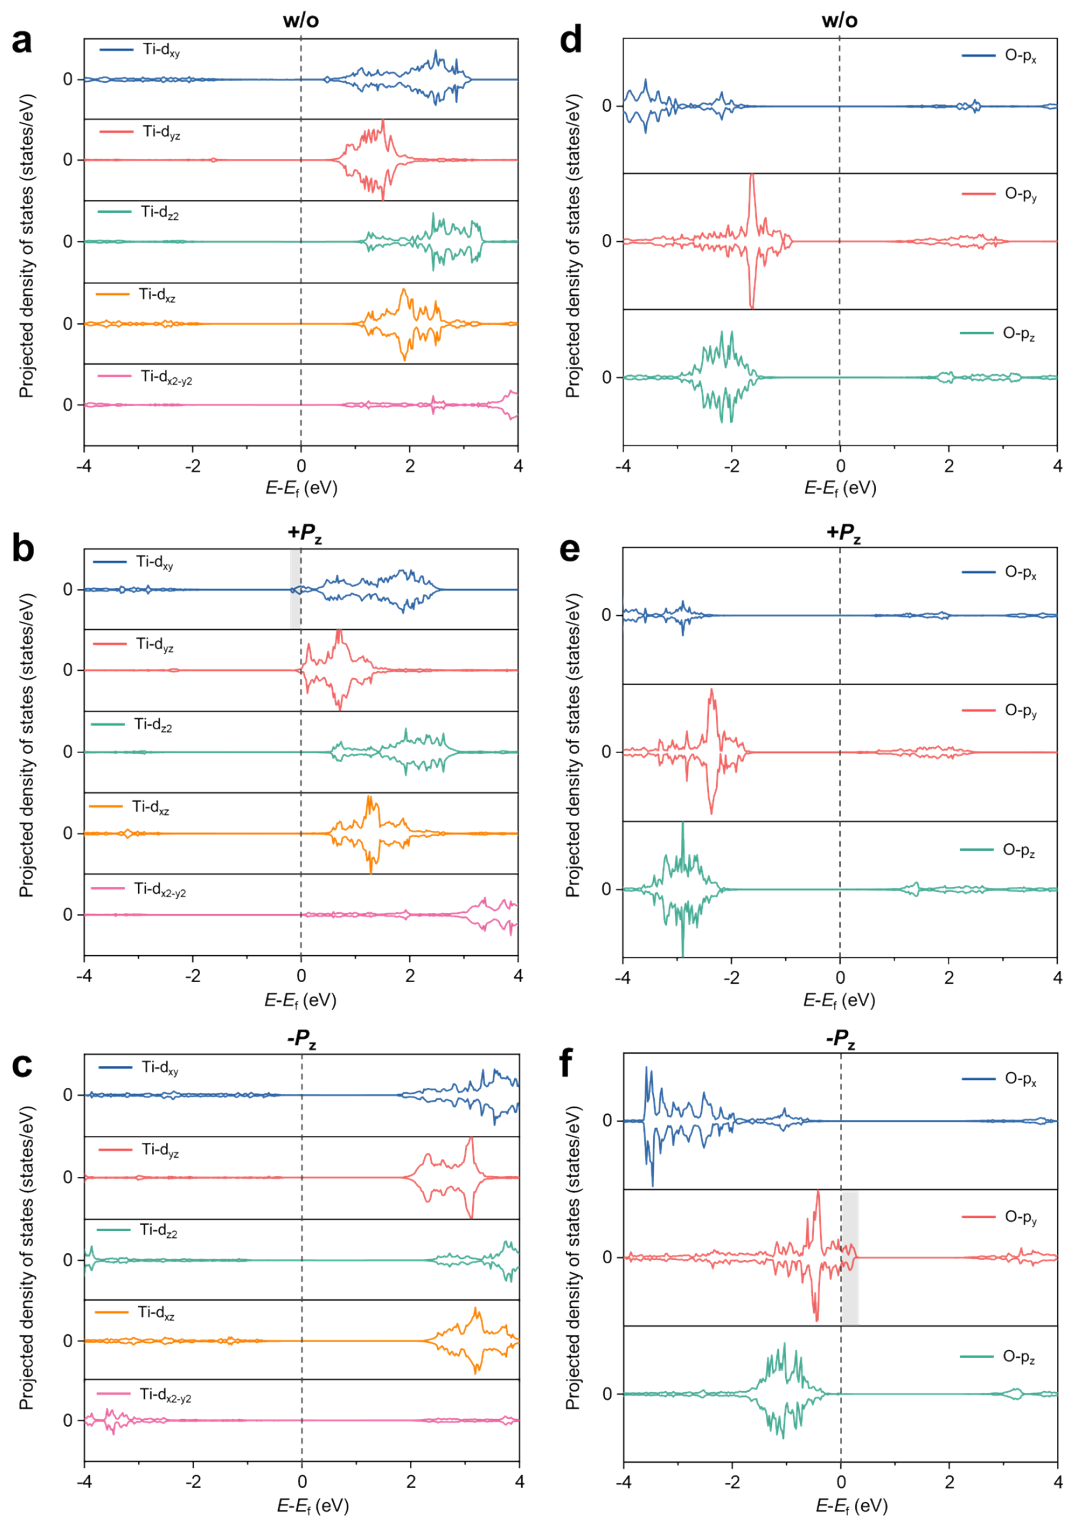

**Fig. S22** Projected density of states of a surface (a-c) Ti and (d-f) O atom for the w/o,  $+P_z$  and  $-P_z$  BTO@TiO<sub>2</sub>. The Fermi level (vertical dashed lines) is set to be the zero.

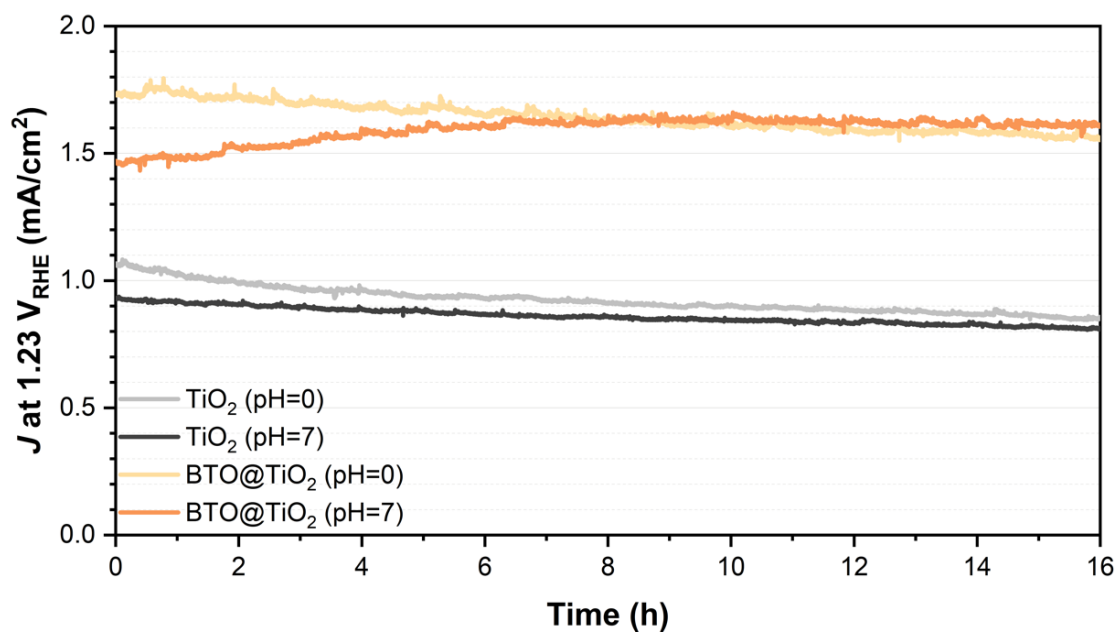

**Fig. S23** The current-time curves of TiO<sub>2</sub> and BTO@TiO<sub>2</sub> obtained in acidic, neutral electrolyte under 1.23 V<sub>RHE</sub>.

## Reference

1. W. Yang, Y. Yu, M. B. Starr, X. Yin, Z. Li, A. Kvit, S. Wang, P. Zhao and X. Wang, *Nano Lett.*, 2015, **15**, 7574-7580.
2. G. Kresse and J. Hafner, *Phys. Rev. B*, 1993, **47**, 558-561.
3. J. P. Perdew, K. Burke and M. Ernzerhof, *Phys. Rev. Lett.*, 1996, **77**, 3865-3868.
4. S. Grimme, J. Antony, S. Ehrlich and H. Krieg, *J. Chem. Phys.*, 2010, **132**.
5. J. K. Nørskov, J. Rossmeisl, A. Logadottir, L. Lindqvist, J. R. Kitchin, T. Bligaard and H. Jónsson, *J. Phys. Chem. B*, 2004, **108**, 17886-17892.
6. S. Assavachin and F. E. Osterloh, *J. Am. Chem. Soc.*, 2023, **145**, 18825-18833.
7. X. Li, Z. Wang, W. Ji, T. Lu, J. You, K. Wang, G. Liu, Y. Liu and L. Wang, *ACS Nano*, 2023, **17**, 22944-22951.
8. F. Wu, Y. Yu, H. Yang, L. N. German, Z. Li, J. Chen, W. Yang, L. Huang, W. Shi, L. Wang and X. Wang, *Adv. Mater.*, 2017, **29**, 1701432.
9. J. Huang, Y. Wang, X. Liu, Y. Li, X. Hu, B. He, Z. Shu, Z. Li and Y. Zhao, *Nano Energy*, 2019, **59**, 33-40.
10. Y. Zhu, X. Ji, Y. Xiong, J. Guo, S. Yao, Q. Lai, P. Li, Y. Zhang and P. Xiao, *Mater. Sci. Semicond. Proces.* 2021, **133**, 105958.
11. M. Sima, E. Vasile, N. Preda, A. Sima, E. Matei and C. Logofatu, *Int. J. Hydro. Energy*, 2021, **46**, 36232-36244.
12. Z. Liu, L. Wang, X. Yu, J. Zhang, R. Yang, X. Zhang, Y. Ji, M. Wu, L. Deng, L. Li and Z. L. Wang, *Adv. Funct. Mater.*, 2019, **29**, 1807279.
13. H. J. Lee, S.-H. Shin, K. T. Nam, J. Nah and M. H. Lee, *J. Mater. Chem. A*, 2016, **4**, 3223-3227.
14. W. Huang, C. Harnagea, X. Tong, D. Benetti, S. Sun, M. Chaker, F. Rosei and R. Nechache, *ACS Appl. Mater. Inter.*, 2019, **11**, 13185-13193.
15. S. Singh and N. Khare, *Appl. Phys. Lett.*, 2017, **110**.
16. X. He, B. Lin, L. Yang, C. Shang, S. Li, Z. Chen and X. Wang, *Energy & Fuels*, 2020, **34**, 16927-16935.
17. M. Rioult, S. Datta, D. Stanesco, S. Stanesco, R. Belkhou, F. Maccherozzi, H. Magnan and A. Barbier, *Appl. Phys. Lett.*, 2015, **107**.
